# Supplementary material
Source: publisher figshare collection journal article supplement (https://gsajournals.figshare.com/ndownloader/files/13173419)
Supplement: Supplementary file 1 [file 13173419]

	condition	trait	par_sig	N2_res	N2nil_sig_CB	N2nil_recap	N2nil_sig_N2	CBnil_sig_N2	CBnil_recap	CBnil_sig_CB	nils_sig	N2nil_res	exp	chr	N2nil	CBnil	N2nil_value	CBnil_value	N2	CB
1	silver	n	0.000893600932402094	TRUE	1.91025004481205e-07	TRUE	0.227462645517384	0.295179687270201	TRUE	0.147579356561697	0.00167669314087027	TRUE	IVL	IV	ECA229	ECA231	24.2834763743719	-10.4527729245033	14.3702957810718	-19.9066888134074
2	silver	mean.norm.EXT	3.27515792264421e-14	TRUE	0.0178849321005812	FALSE	3.26405569239796e-14	6.30456703509807e-08	TRUE	9.09087249922891e-11	7.061018436616e-14	FALSE	IVL	IV	ECA229	ECA231	-0.0829573686704894	0.0365012663579958	0.0736121897923409	-0.0436865292573648
3	silver	q10.norm.EXT	1.66422431391311e-13	TRUE	0.249056143197161	FALSE	6.97220059464598e-14	7.26085858104852e-14	TRUE	0.819407409919737	0.75301651752358	FALSE	IVL	IV	ECA229	ECA231	-0.0209014456709248	-0.0144275321508714	0.0385805846468291	-0.00819693832051595
4	silver	q25.norm.EXT	3.34177130412172e-14	TRUE	0.243184945679722	FALSE	3.26405569239796e-14	7.50510764646606e-14	TRUE	0.00216776360566795	1.16992483412126e-06	FALSE	IVL	IV	ECA229	ECA231	-0.0378497969371727	0.00721582104022129	0.0579339003331573	-0.0246091513465165
5	silver	median.norm.EXT	7.23865412055602e-14	TRUE	0.00474813298415944	FALSE	7.23865412055602e-14	3.69626372842546e-08	TRUE	1.17339471472633e-12	8.60422844084496e-14	FALSE	IVL	IV	ECA229	ECA231	-0.0778626685527096	0.0400311559956826	0.0658887370653212	-0.0463217744835535
6	silver	q75.norm.EXT	2.60902410786912e-14	TRUE	0.00591115101570872	FALSE	2.03170813506404e-14	0.0013026049205056	TRUE	5.21249710061511e-13	3.2085445411667e-14	FALSE	IVL	IV	ECA229	ECA231	-0.15320627297185	0.0832248516648703	0.123820901717569	-0.0743488777122435
7	silver	q90.norm.EXT	3.31024097022237e-12	TRUE	0.615788270325592	FALSE	0	0.0702394228544296	TRUE	2.01048566106365e-06	1.16537485217449e-08	FALSE	IVL	IV	ECA229	ECA231	-0.0993441505718057	0.0470571149598086	0.104747166422607	-0.0818836000072227
8	silver	norm.n	3.39552468430204e-05	TRUE	1.55730253835751e-05	TRUE	0.998021617708343	0.130890563334805	TRUE	0.0594443264789146	0.0875829455605098	TRUE	IVL	IV	ECA229	ECA231	4.43547944911544	-2.65563378522947	6.88959574827388	-6.97468355976749
9	carmustine	q10.norm.EXT	0.0674341879289228	TRUE	0.916024493395015	FALSE	0.0112847995083877	0.3581378221089	FALSE	0.000325048363021052	2.24449128854998e-05	FALSE	IVL	IV	ECA229	ECA231	-0.0133522215427708	0.0107824346449194	0.000957099423107719	-0.0118921432216551
10	carmustine	q25.norm.EXT	5.77315972805081e-15	TRUE	0.0121371319721081	FALSE	0	0.480207884414938	FALSE	3.44169137633799e-15	0	FALSE	IVL	IV	ECA229	ECA231	-0.0673038680308688	0.0516056975879308	0.0352537296991478	-0.0409347189673855
11	chlorothalonil	mean.norm.EXT	0.00020043882986942	TRUE	7.94697641026687e-13	FALSE	7.94697641026687e-13	0.000316178110504994	TRUE	0.99911207035954	7.94697641026687e-13	FALSE	IVL	IV	ECA229	ECA231	-0.19652772033227	0.04644267002661	0.0763434399115443	0.0266281797068967
12	chlorothalonil	median.norm.EXT	1.29431836359828e-08	TRUE	9.41913214091983e-13	FALSE	9.3913765653042e-13	0.723104120966394	FALSE	3.39135290516879e-06	9.3913765653042e-13	FALSE	IVL	IV	ECA229	ECA231	-0.180792523905063	0.0756364430430528	0.0670317299577582	-0.0142188563842919
13	chlorothalonil	q75.norm.EXT	4.5622022715186e-08	TRUE	8.77076189453874e-13	FALSE	8.77076189453874e-13	3.22564197574593e-12	TRUE	0.357891991536386	8.77076189453874e-13	FALSE	IVL	IV	ECA229	ECA231	-0.321346773296617	0.0281123410906259	0.170108721900017	0.0454100912156724
14	chlorothalonil	q90.norm.EXT	0.0363979043436824	TRUE	7.36410932233866e-13	FALSE	7.36410932233866e-13	8.16392109470598e-09	TRUE	0.00284178077537101	7.36410932233866e-13	FALSE	IVL	IV	ECA229	ECA231	-0.430090497575036	0.0150406383885979	0.161713609297389	0.11823836046969
15	chlorothalonil	cv.TOF	0.0025251554689667	TRUE	1.06303854607859e-12	TRUE	6.61464426565672e-08	0.665676097546068	FALSE	2.69467427438386e-05	1.57240660346725e-05	TRUE	IVL	IV	ECA229	ECA231	0.0386700980284705	0.00728848614441655	-0.00928527674718323	-0.0349382823048818
16	chlorothalonil	cv.EXT	0.0520853151408984	TRUE	9.779954623923e-13	TRUE	1.33115740652556e-12	0.31482672831684	FALSE	0.000151140053027521	9.90469350981016e-09	TRUE	IVL	IV	ECA229	ECA231	0.202107750974641	0.0429110547518203	-0.0279670936896922	-0.130337985490626
17	tunicamycin	n	2.67641645179673e-06	TRUE	0.236596175978676	TRUE	0.0083238517698303	0.703526797409731	TRUE	0.000294016224144267	0.13842917031941	FALSE	IVL	IV	ECA229	ECA231	-13.2364828296629	7.64056875815851	30.3661352487359	-18.9733611482339
18	tunicamycin	mean.TOF	1.31503616651596e-06	TRUE	0.000241414338017276	FALSE	2.55795384873636e-13	0.0460036994113151	TRUE	0.0279042454968017	9.853262650239e-11	FALSE	IVL	IV	ECA229	ECA231	-15.7048373535236	7.1975192115957	11.2943515649322	-1.36837531596149
19	tunicamycin	median.TOF	4.72792287808943e-06	TRUE	0.00441106841515737	FALSE	9.04831765069503e-14	0.00493554243374006	TRUE	0.266009271058849	1.31228913846648e-06	FALSE	IVL	IV	ECA229	ECA231	-14.7444440897017	8.40911644040868	13.4531824036385	-3.45873217049278
20	tunicamycin	q75.TOF	1.84686673146972e-05	TRUE	8.4167471400276e-06	FALSE	6.32827124036339e-15	0.00627890488450122	TRUE	0.415046660409945	1.79821801893354e-09	FALSE	IVL	IV	ECA229	ECA231	-24.1305289083802	6.88493811861595	19.807594951078	-1.75808204209784
21	tunicamycin	q90.TOF	0.000185523602575066	TRUE	0.000200732526859038	FALSE	7.20534742981727e-14	0.912987795243386	TRUE	0.00216690612410519	5.5078164251654e-13	FALSE	IVL	IV	ECA229	ECA231	-31.5253920419051	15.837219577061	18.7366707800939	-2.92012002574875
22	tunicamycin	mean.EXT	9.78938900142445e-06	TRUE	2.55967541646918e-05	FALSE	2.54019028034236e-13	0.999734384679254	FALSE	5.95662479829784e-06	2.54241072639161e-13	FALSE	IVL	IV	ECA229	ECA231	-52.1837669277939	37.9332970473637	26.4835492963766	-3.93291253894536
23	tunicamycin	median.EXT	3.83750565443597e-05	TRUE	1.18707932372786e-10	FALSE	0	0.999783763813739	FALSE	2.45885148122404e-05	0	FALSE	IVL	IV	ECA229	ECA231	-47.6140019167991	34.2327025256953	25.6736745799454	-2.6962305299943
24	tunicamycin	q75.EXT	0.000327698565024015	TRUE	4.94140025342205e-07	FALSE	8.27116153345742e-14	0.999999363920488	FALSE	0.000312503465346059	8.21565038222616e-14	FALSE	IVL	IV	ECA229	ECA231	-76.3872124134463	53.044258819761	40.5729509982231	-6.88436815287611
25	tunicamycin	q90.EXT	0.0175402815234319	TRUE	5.45573726751236e-07	FALSE	1.33448807559944e-13	0.70801456339052	FALSE	0.000452595331223882	1.26898491714655e-13	FALSE	IVL	IV	ECA229	ECA231	-144.137827938731	81.3999158540845	39.6314900904214	-4.54698482541889
26	tunicamycin	mean.norm.EXT	0.000241280253262977	TRUE	3.44582795630544e-09	FALSE	1.00253139123652e-13	1.41438593980192e-05	FALSE	1.08468789505878e-13	7.00550728538474e-14	FALSE	IVL	IV	ECA229	ECA231	-0.139888077128073	0.14781948092444	0.0468770801814662	-0.0239412797226577
27	tunicamycin	q10.norm.EXT	0.3477780434289	TRUE	0.83932815151997	FALSE	0.0640665189404156	1.94537722794097e-05	FALSE	6.17327100549403e-09	6.17876860786737e-11	FALSE	IVL	IV	ECA229	ECA231	-0.0168265190417937	0.0287101824482577	-0.00621565563125338	-0.0139699117852128
28	tunicamycin	q25.norm.EXT	4.34362877888006e-08	TRUE	0.00319479105697096	FALSE	9.5590202420226e-14	3.2440287394131e-06	FALSE	7.80486786311485e-14	5.6399329650958e-14	FALSE	IVL	IV	ECA229	ECA231	-0.0705110504585835	0.0785181798599569	0.0207022618633027	-0.0341357694183058
29	tunicamycin	median.norm.EXT	1.9438924194759e-06	TRUE	0.00322172524420217	FALSE	1.06248343456627e-13	3.71026986911716e-10	FALSE	7.38298311375729e-14	7.00550728538474e-14	FALSE	IVL	IV	ECA229	ECA231	-0.119689635841227	0.150083731782924	0.0238566044604429	-0.0530774721369617
30	tunicamycin	q75.norm.EXT	3.90038305753126e-06	TRUE	3.60819152334102e-11	FALSE	7.02771174587724e-14	1.40840963293032e-05	FALSE	1.07358566481253e-13	7.00550728538474e-14	FALSE	IVL	IV	ECA229	ECA231	-0.265783514621159	0.237560193531855	0.0882712165130564	-0.0486276406720346
31	tunicamycin	q90.norm.EXT	0.211645744048222	TRUE	1.14463993838854e-13	FALSE	9.12603326241879e-14	0.0100883627778182	FALSE	5.21590022262153e-06	5.6399329650958e-14	FALSE	IVL	IV	ECA229	ECA231	-0.306718611387584	0.242671126282087	0.0636137623891428	0.0197670983379423
32	tunicamycin	norm.n	6.51910574644976e-06	TRUE	0.359696129493375	FALSE	1.41093536853987e-09	0.405049557944356	TRUE	0.00352998560027296	4.2990010050703e-06	FALSE	IVL	IV	ECA229	ECA231	-11.1833799233748	3.99110035086203	12.1391029430465	-5.72607006760915
33	cisplatin	mean.TOF	0.0528954381614025	TRUE	3.6255756608039e-07	FALSE	6.75126621274558e-13	0.000305911382251112	TRUE	0.442670645256917	0.000246909427812358	FALSE	IVL	IV	ECA229	ECA231	-6.72340923237276	-1.63644198610561	5.02270356962926	1.39020122662327
34	cisplatin	median.TOF	0.341162250756066	TRUE	8.05201127995758e-10	FALSE	6.12510042685699e-13	0.0655499282736218	TRUE	0.869215271939071	3.22170613520356e-08	FALSE	IVL	IV	ECA229	ECA231	-8.54402026258521	0.954087329182063	4.98262989392925	1.58878838051328
35	cisplatin	q75.TOF	5.4958900197577e-05	TRUE	9.11627462407694e-09	FALSE	8.28559443277754e-13	0.00100196536143138	TRUE	0.86938145599013	6.6956773459026e-11	FALSE	IVL	IV	ECA229	ECA231	-9.88173194162011	0.260110864291788	8.56410985471928	0.258532480620013
36	cisplatin	q90.TOF	6.7566195094404e-07	TRUE	0.00995022843937077	FALSE	5.59663426713541e-13	0.1216312841073	TRUE	0.00712693273293763	3.97575117272453e-09	FALSE	IVL	IV	ECA229	ECA231	-12.3956508739057	1.08787247547096	11.9814197709251	-4.35706403807803
37	cisplatin	mean.EXT	1.10605968828281e-11	TRUE	7.04347691282692e-12	FALSE	5.15698594938385e-13	0.000413506009304343	TRUE	0.00510991038744468	5.46562795022965e-13	FALSE	IVL	IV	ECA229	ECA231	-31.9531708746204	9.11067094967646	24.0100474186492	-4.98524584579714
38	cisplatin	median.EXT	5.24743866215927e-05	TRUE	6.18838313926062e-13	FALSE	5.81867887206045e-13	3.51548422705683e-07	TRUE	0.731495609501549	6.68576305429269e-13	FALSE	IVL	IV	ECA229	ECA231	-21.9959545231252	2.14324887806095	17.0003825718527	5.25253591587363
39	cisplatin	q75.EXT	5.25477106272376e-10	TRUE	6.25832718981201e-13	FALSE	6.14508444130024e-13	5.38823645590547e-07	TRUE	0.586791203882017	6.14730488734949e-13	FALSE	IVL	IV	ECA229	ECA231	-49.0430447867794	6.29182347305343	32.1065052818023	3.65391349650714
40	cisplatin	q90.EXT	2.63147281742704e-11	TRUE	6.81094414201056e-09	FALSE	8.11239964093602e-13	0.0020521872021817	TRUE	0.00167332038993451	8.48321413116082e-13	FALSE	IVL	IV	ECA229	ECA231	-52.2452391448447	11.8117553428736	43.9370539463796	-13.3499866786012
41	cisplatin	var.TOF	0.0741127852975046	TRUE	0.769862534091258	TRUE	0.504273077957518	0.508746408311644	FALSE	0.000914082383528303	0.0322949553585987	FALSE	IVL	IV	ECA229	ECA231	-1082.10145055612	700.048708929092	-492.126357400634	-1240.86781155692
42	cisplatin	var.EXT	8.31779090049167e-13	TRUE	0.956884794451817	TRUE	1.6870727037599e-11	0.41782668711078	TRUE	3.17669046623337e-09	1.10499054573054e-07	FALSE	IVL	IV	ECA229	ECA231	-25855.2939341672	15706.522430888	29233.2430446821	-27217.4484760487
43	chlorothalonil	mean.norm.EXT	0.00114530931121981	FALSE	0.00432376071657969	FALSE	2.96334068394799e-11	0.202294028394095	TRUE	0.273937358241457	1.98394871830931e-06	TRUE	IVR	IV	ECA241	ECA240	0.0433507276220508	-0.00661263240625534	-0.0324252358320614	0.0281861803480523
44	chlorothalonil	median.norm.EXT	0	TRUE	0	TRUE	3.57933472694416e-06	0.408495812967427	TRUE	5.23751630954195e-09	6.8485694892928e-10	TRUE	IVR	IV	ECA241	ECA240	0.054442163829035	0.00343902408835127	0.0175988847681795	-0.0745238963454777
45	chlorothalonil	q75.norm.EXT	0.989069454486849	FALSE	0.0803168965707259	FALSE	0.0346927862267492	0.888257276269139	FALSE	0.727944584804764	0.00351544651587454	TRUE	IVR	IV	ECA241	ECA240	0.0359401781022095	-0.0120035361176865	0.000593945050931052	0.00767906990360051
46	chlorothalonil	q90.norm.EXT	0	FALSE	1.2168527573797e-05	TRUE	6.33801591320982e-07	0.0750005457547407	TRUE	0	0.0139423543164887	TRUE	IVR	IV	ECA241	ECA240	0.00380456924786619	-0.0413215408983954	-0.0965775671352818	0.172207866098983
47	irinotecan	cv.TOF	0.999994392787889	FALSE	0.808435156210854	FALSE	0.768563359157288	0.00143963564739513	TRUE	0.00315793043606283	0.0411499352147089	FALSE	IVR	IV	ECA241	ECA240	-0.0134986223556576	0.0503775452475727	-0.0439185311208893	-0.0241424042537509
48	irinotecan	cv.EXT	0.0339616846018682	FALSE	0.999839746301671	FALSE	0.0305025698039723	7.45477572570152e-05	TRUE	0.432041195541255	0.347892733531723	FALSE	IVR	IV	ECA241	ECA240	0.0380851290172674	0.0890791342101888	-0.0966062374577674	0.0296513810682665
49	fluoxetine	mean.EXT	0.298482766510731	TRUE	0.475899601738119	TRUE	0.999988981608801	0.0112438875780552	TRUE	0.886859295757009	0.0808795384687233	TRUE	IVR	IV	ECA241	ECA240	30.5808448922381	-35.0812678260975	21.6915816806051	-28.1988757265062
50	fluoxetine	q75.EXT	0.421461524042582	TRUE	0.851361920853554	TRUE	0.928907437252853	0.0111720337418	TRUE	0.805251027861685	0.241700604774814	TRUE	IVR	IV	ECA241	ECA240	71.9339486626897	-44.8619735673263	98.2984810672468	-29.6984832623936
51	fluoxetine	q90.EXT	0.000171729193047865	TRUE	0.283276690942845	TRUE	0.0941523648396665	3.52296276595609e-08	TRUE	0.848101959579653	0.0257846071005	TRUE	IVR	IV	ECA241	ECA240	-3.14605872451708	-62.077438406556	52.9970683579593	-72.2994102944811
52	fluoxetine	mean.norm.EXT	0.903006539243284	TRUE	0.984831842699786	TRUE	0.993733086602626	0.978012117935106	TRUE	0.797777424344356	0.950203021661861	TRUE	IVR	IV	ECA241	ECA240	-0.00562362714569982	-0.00574954037736975	0.022524291463774	-0.0362793337621746
53	fluoxetine	q75.norm.EXT	0.971688744713736	TRUE	0.999999961907483	TRUE	0.970592575338411	0.991899999170533	TRUE	0.997940671430085	0.99775568334241	TRUE	IVR	IV	ECA241	ECA240	0.0708263181485408	-0.0703489973553241	0.0750280698215085	-0.119731469772939
54	fluoxetine	q90.norm.EXT	0.991826362794106	TRUE	0.306177236832248	FALSE	0.0767280445310535	0.276300950136233	TRUE	0.684791690581916	0.835419025322206	FALSE	IVR	IV	ECA241	ECA240	-0.26645135472354	-0.110109642615232	0.104250811841813	0.00588490715245871
55	cisplatin	n	7.19424519957101e-14	FALSE	0.00240466556203434	TRUE	1.49595889085141e-05	0.000897412794731545	TRUE	4.2000977224621e-05	0.733554255329848	TRUE	V	V	ECA230	ECA232	7.89707888875765	-0.604334626371578	-24.7683331203808	31.5635372650967
56	cisplatin	mean.TOF	0.385262803649661	TRUE	0.200168868288292	FALSE	0.00257493085748717	0.0356686126049739	FALSE	0.000156414677403904	1.49018051232019e-08	FALSE	V	V	ECA230	ECA232	-5.78731111735099	7.14700546704386	-0.462280089429342	-1.64334430419546
57	cisplatin	median.TOF	0.332094094076055	FALSE	0.00935505608759868	FALSE	1.88086027408385e-05	1.03445030319449e-11	TRUE	7.57052237565503e-08	0.0368328688032259	FALSE	V	V	ECA230	ECA232	1.22488100386456	8.01513602672535	-9.26733992157449	-2.73054276475098
58	cisplatin	q75.TOF	4.0374558905043e-06	TRUE	0.115949907300773	FALSE	3.32044391981867e-11	0.156005563324898	FALSE	8.65437721486728e-11	1.49880108324396e-14	FALSE	V	V	ECA230	ECA232	-10.7443885126359	12.1484266080233	6.33476418786493	-5.09650098219314
59	cisplatin	q90.TOF	2.03196570680575e-07	TRUE	7.39408534400354e-13	FALSE	0	3.14483397010346e-05	TRUE	0.681319688323409	0	FALSE	V	V	ECA230	ECA232	-31.0861671950363	2.99209025555558	20.4173522731521	-0.0701243871517447
60	cisplatin	mean.EXT	0.979165890003441	FALSE	7.36077865326479e-14	TRUE	7.21644966006352e-14	0.601075215742084	FALSE	0.830406199734849	1.99062988315291e-13	FALSE	V	V	ECA230	ECA232	-34.7099460565482	8.53218515874639	12.1249840781057	14.0474644701154
61	cisplatin	median.EXT	0.0096787489853053	FALSE	2.43458316369072e-05	TRUE	0.39351906961638	0.00272474298444436	TRUE	0.977479400094706	4.51379142463182e-06	FALSE	V	V	ECA230	ECA232	-11.7458117045054	8.00663715178185	-9.6418371842567	6.50559938057297
62	cisplatin	q75.EXT	0.178338578094469	TRUE	1.31006316905768e-14	FALSE	0	0.0366721387984131	TRUE	0.910820442457627	1.69864122767649e-14	FALSE	V	V	ECA230	ECA232	-48.36291276671	7.63767908315174	20.6015694301204	8.19094226707555
63	cisplatin	q90.EXT	0.0383375140333707	FALSE	7.43849426498855e-15	TRUE	3.2085445411667e-14	0.290660395108273	FALSE	9.70877012503868e-05	4.69624339416441e-14	FALSE	V	V	ECA230	ECA232	-112.47747674437	-2.99193733059739	31.3832578330079	69.2619501261067
64	cisplatin	norm.n	5.69016871954098e-07	FALSE	0.0263173773402348	TRUE	0.0334166758825238	0.0302128113632452	TRUE	0.0243398261420279	0.999999953880287	TRUE	V	V	ECA230	ECA232	1.03012092925544	0.687789547251538	-5.69171541570922	6.94478047780144
65	chlorothalonil	mean.TOF	0.0871398058019888	TRUE	0	TRUE	0	0.418581127079221	FALSE	0.000680538806931308	0	TRUE	V	V	ECA230	ECA232	17.0405849486929	-0.57084738982548	-4.9524590194786	-10.0993636448179
66	chlorothalonil	median.TOF	0.999900269564201	FALSE	5.89528426075958e-14	FALSE	5.86197757002083e-14	0.696920694211071	TRUE	0.652400842952943	9.13713549266504e-14	TRUE	V	V	ECA230	ECA232	11.0543044101308	-3.05062686324114	-5.03202210958673	-4.98587107553341
67	chlorothalonil	q75.TOF	2.32995867155417e-07	TRUE	0	TRUE	2.30926389122033e-14	0.60961966137376	FALSE	2.42740272327069e-10	2.68118860446975e-13	TRUE	V	V	ECA230	ECA232	24.575724326879	-2.13951784603735	-2.55472996408142	-21.3585516881906
68	chlorothalonil	mean.EXT	6.36990460378684e-12	TRUE	0	TRUE	2.6255427104882e-05	0.737167785361473	TRUE	9.81796755006314e-10	1.57968015446208e-07	TRUE	V	V	ECA230	ECA232	29.6796126209434	-5.64359828138236	3.71213025974635	-34.6044366801552
69	chlorothalonil	median.EXT	1.7430501486615e-14	TRUE	0	TRUE	0.502585058611295	0.98666254349509	TRUE	1.62092561595273e-14	0.705852994335283	TRUE	V	V	ECA230	ECA232	7.92550605381987	5.46341547077372	7.52050129722482	-24.5095190944668
70	chlorothalonil	q75.EXT	0	TRUE	0	TRUE	0.000133610542501161	0.00270534418430324	TRUE	1.57795998489973e-12	1.33537625401914e-12	TRUE	V	V	ECA230	ECA232	42.260147870646	-8.39853400679974	19.1242184736501	-59.4317650523773
71	carmustine	mean.TOF	0.000539667939390642	TRUE	0.0048872097641236	TRUE	0.929094515473311	0.456343122453895	FALSE	6.80621604298715e-07	0.160881244993723	FALSE	V	V	ECA230	ECA232	1.31901556048249	4.15510099983861	0.403998911828051	-7.72372594786022
72	carmustine	median.TOF	2.08819759520695e-05	TRUE	0.205863950463247	TRUE	0.0306687664258397	0.702317953302033	FALSE	9.88773664056808e-08	0.000852587912550606	FALSE	V	V	ECA230	ECA232	-1.91541829542992	7.85513228136613	3.26081774100703	-6.10650485602928
73	carmustine	q75.TOF	4.82899098852574e-06	TRUE	1.23691521469738e-08	TRUE	0.654457198745472	0.0138864162159864	FALSE	0	0.241774296729458	FALSE	V	V	ECA230	ECA232	0.886325549971039	11.9600319474984	2.57558386426263	-16.599544382382
74	carmustine	q90.TOF	0.148721376406387	TRUE	5.0554888033294e-05	TRUE	0.0766359765060243	0.0367046831961243	FALSE	1.31339647680973e-05	0.993104561269518	FALSE	V	V	ECA230	ECA232	9.81318355286052	14.0380141306394	-7.82358462685161	-15.8885208252045
75	carmustine	mean.EXT	1.54309593203283e-06	TRUE	0.00115148989913982	TRUE	0.45869840822707	0.0807387802537055	FALSE	9.66449142936199e-13	0.00085104572572392	FALSE	V	V	ECA230	ECA232	0.0140669677425744	27.0444646533724	4.07023690997721	-32.8446514347736
76	carmustine	median.EXT	0	TRUE	0.733453194320654	TRUE	1.53522750068191e-11	0.0105774580320448	FALSE	0	0	FALSE	V	V	ECA230	ECA232	-18.7673044958422	38.8499392607129	14.8745305989507	-26.4319069632875
77	carmustine	q75.EXT	0.0102407442770264	TRUE	0.000295511743593879	TRUE	0.75556724204194	0.999999632314303	TRUE	0.00991975600577721	0.76129917085537	TRUE	V	V	ECA230	ECA232	31.7275839644324	5.24032215887121	6.86994403254936	-43.9245214724814
78	carmustine	q90.EXT	0.0339437946308712	TRUE	0.0598577767421754	TRUE	0.996878920178596	0.534402031907642	FALSE	0.000332506792022014	0.409464575063799	FALSE	V	V	ECA230	ECA232	-9.57210786730803	47.9369645537588	17.6202270379458	-63.7451339186798
79	carmustine	median.norm.EXT	0	TRUE	0	TRUE	0.000350449671648545	4.47800505565255e-08	FALSE	0	0	FALSE	V	V	ECA230	ECA232	-0.0113386614378218	0.131217431313744	0.0468342688544632	-0.135384479185926
80	paraquat	mean.TOF	3.99446938859072e-08	FALSE	0.165826670707409	FALSE	7.92255150372512e-13	5.10813613630035e-13	TRUE	3.59070755351354e-08	0.00110832561582175	FALSE	V	V	ECA230	ECA232	2.81894677454952	7.64194113835325	-8.49202552941956	-2.01472179807483
81	paraquat	q10.TOF	6.14508444130024e-13	FALSE	0.401401919087223	TRUE	6.14508444130024e-13	6.14508444130024e-13	TRUE	0.0721197495619215	0.84122211494251	TRUE	V	V	ECA230	ECA232	3.69564492822583	2.90697890726511	-10.5028280757751	5.13312052107158
82	paraquat	q25.TOF	5.15698594938385e-13	FALSE	0.000360208852788313	FALSE	5.15698594938385e-13	5.15698594938385e-13	TRUE	7.06198796613933e-05	0.992001935042499	TRUE	V	V	ECA230	ECA232	7.77727237254832	6.46654851224344	-13.6838414107836	1.2097028276697
83	paraquat	median.TOF	0.00133058874824354	FALSE	0.000320968531426491	FALSE	1.23889787317921e-12	5.15698594938385e-13	TRUE	5.1592063954331e-13	6.82676137842009e-13	FALSE	V	V	ECA230	ECA232	3.7268775904859	14.0247654041468	-10.5146081432598	-7.48806110580062
84	paraquat	q75.TOF	0.913357883159479	TRUE	0.00421819905739551	TRUE	0.000361466825513412	6.33826324758502e-13	FALSE	7.90301157849171e-12	0.000760276597902898	FALSE	V	V	ECA230	ECA232	2.49519732516432	8.2089612967985	-6.13055406384897	-6.94707097311298
85	paraquat	q90.TOF	4.08772605737795e-05	FALSE	0.999861294043687	FALSE	3.57594109990922e-05	0.0223331894389082	TRUE	0.29669306829039	0.269039510185476	TRUE	V	V	ECA230	ECA232	6.22167357146607	-0.432318976740962	-9.70007546096097	4.13130895064726
86	paraquat	mean.EXT	0.00577593936738396	FALSE	0.00234002969023261	FALSE	2.60827137665842e-10	7.10777402268548e-07	TRUE	0.161987917211053	0.409125935861681	TRUE	V	V	ECA230	ECA232	20.5415566290614	3.62241498123453	-16.233078993072	-10.935345440655
87	paraquat	q10.EXT	0	FALSE	1.90228973743212e-05	TRUE	4.90656959506452e-10	0.0185443227490153	TRUE	3.66373598126302e-15	0.000789457676378835	TRUE	V	V	ECA230	ECA232	1.96928191359943	-3.39659087869652	-7.56442331380359	10.3358708864923
88	paraquat	q25.EXT	0.000225408507834923	FALSE	0.982041431391284	FALSE	0.00132779870470268	1.21506592343223e-07	TRUE	0.407177617122548	0.229561488180127	FALSE	V	V	ECA230	ECA232	1.53914221533365	7.81725246469543	-9.06787479642021	-1.98453958117998
89	paraquat	median.EXT	6.11033616715329e-06	FALSE	0.901196235177776	FALSE	2.84284068174934e-07	6.33160190943727e-13	TRUE	1.42983241913086e-08	9.84033340700741e-07	FALSE	V	V	ECA230	ECA232	0.859288608077647	18.6077943816748	-12.6235914685669	-4.77612210475763
90	paraquat	q75.EXT	0.260411973908663	TRUE	2.46194176156678e-11	TRUE	5.9894505044511e-07	0.342639750005488	FALSE	0.00301771425833997	0.000837894903517267	TRUE	V	V	ECA230	ECA232	18.4839665655645	4.21358291682172	-4.67897178575634	-36.1223889268438
91	paraquat	q90.EXT	7.39449146358595e-09	FALSE	0.0121845195724395	FALSE	0	2.5982937256197e-06	TRUE	0.631188894234533	0.000136431298844442	TRUE	V	V	ECA230	ECA232	59.8881564645895	5.94242632773842	-70.330411013846	8.67309276864319
92	silver	mean.TOF	8.35478353167218e-11	TRUE	0.749745137791306	FALSE	2.97095681389692e-13	0.873190098528754	FALSE	1.16184839527023e-12	8.29336599394992e-14	FALSE	V	V	ECA230	ECA232	-5.21395690801911	5.47503284608919	3.24176762700186	-4.18466042324664
93	silver	median.TOF	3.03066016726916e-10	TRUE	0.999697269939998	TRUE	4.52883508472723e-10	0.703685206088234	FALSE	3.96571664396106e-13	5.54445378497803e-13	FALSE	V	V	ECA230	ECA232	-4.20333716284693	5.92034614543305	3.05170427764614	-4.55425544366933
94	silver	q75.TOF	1.04027897407377e-13	TRUE	0.434370629437083	FALSE	7.62723217917483e-14	0.0209453363252118	FALSE	7.57172102794357e-14	7.57172102794357e-14	FALSE	V	V	ECA230	ECA232	-15.0556769939333	17.2088906186006	7.17912400981802	-11.2760112387488
95	silver	q90.TOF	8.37108160567368e-14	TRUE	0.000455194416390192	TRUE	2.98825268063574e-06	0.99991039266582	TRUE	8.29336599394992e-14	5.3113613250888e-06	FALSE	V	V	ECA230	ECA232	-4.17688166773679	12.1701306432307	13.0008839580462	-18.5832674703337
96	silver	mean.EXT	7.31370519702068e-12	TRUE	0.859599971128948	TRUE	1.2040738406327e-09	0.087673937995815	FALSE	8.33777491493493e-14	8.12683254025615e-14	FALSE	V	V	ECA230	ECA232	-7.90056072910278	13.4754744258601	7.43447867634901	-10.8191713686121
97	silver	median.EXT	7.99360577730113e-14	TRUE	0.721025144130387	FALSE	7.87148124459236e-14	0.00728142778477647	FALSE	4.31876756579186e-14	4.30766533554561e-14	FALSE	V	V	ECA230	ECA232	-10.4367833831009	13.4183023397938	6.14789438244148	-8.84139956113197
98	silver	q75.EXT	1.73083769539062e-13	TRUE	0.336840319973706	TRUE	1.73083769539062e-13	0.573786431949817	TRUE	1.73083769539062e-13	1.73083769539062e-13	FALSE	V	V	ECA230	ECA232	-22.5970654563094	22.7830128954724	29.8935523981539	-27.3783192997891
99	silver	q90.EXT	0.00015977789663757	TRUE	0.0003941632059693	TRUE	0.995233230483167	0.981596071888819	TRUE	0.000680455145489312	0.999017263516592	TRUE	V	V	ECA230	ECA232	8.36121891432669	2.26193928624024	12.6399431018459	-17.0031534618759
100	carmustine	mean.TOF	0.00500162268935556	FALSE	0.166143576289569	FALSE	2.46829657268854e-07	0.564470397647725	TRUE	0.143932817076163	9.05929160368579e-05	TRUE	CSSV	V	ECA554	ECA573	6.89129914661458	-3.89341913695623	-6.07756791693992	2.98508219429497
101	carmustine	median.TOF	0.880602964324075	FALSE	0.237748629096957	FALSE	0.0296974361005343	0.825436204788472	TRUE	0.9998904860052	0.217158684987714	TRUE	CSSV	V	ECA554	ECA573	5.91076033665376	-2.32679299032114	-2.55891107758294	-0.74948262544682
102	carmustine	q75.TOF	0.0474286966801847	FALSE	0.0656949948652918	FALSE	1.41557700938932e-06	0.888996059816511	FALSE	0.210429081088846	2.99380680386374e-05	TRUE	CSSV	V	ECA554	ECA573	13.3152986913283	-7.0930364232443	-6.7243825720659	4.21206484626498
103	carmustine	q90.TOF	7.34043326695577e-05	FALSE	0.0363523259328385	TRUE	0.268303466209446	0.0873980406738756	FALSE	3.69223096541305e-10	0.000196332176848113	TRUE	CSSV	V	ECA554	ECA573	-2.70481982975381	-21.1585803147732	-7.68798078259775	24.469734069423
104	carmustine	mean.EXT	1.4517329193886e-05	FALSE	0.986369282240652	TRUE	3.24379129332808e-05	0.94932066894573	FALSE	1.10352310678241e-06	2.40506414295183e-06	TRUE	CSSV	V	ECA554	ECA573	18.9064256504271	-28.5510345087115	-26.9144679959761	39.9599215433304
105	carmustine	median.EXT	0.00706866482943813	TRUE	0.0210283046463801	FALSE	3.01636426947027e-09	0.345182745394484	TRUE	0.335523790896936	1.39021917268112e-05	FALSE	CSSV	V	ECA554	ECA573	-27.5307784887855	8.05272664006548	26.3115659595705	-14.1675371140424
106	carmustine	q75.EXT	2.12288835399477e-07	FALSE	0.993628016012157	TRUE	1.61270405918401e-08	0.256508074894402	FALSE	4.9560355819267e-12	1.02629016396349e-12	TRUE	CSSV	V	ECA554	ECA573	65.7636322980786	-104.977733467654	-46.7050830659784	100.629561456187
107	carmustine	q90.EXT	8.61755111714047e-13	FALSE	0.0063492560173819	TRUE	1.05725951993207e-07	0.0656693083003423	FALSE	8.39328606616618e-13	8.86291040558262e-13	TRUE	CSSV	V	ECA554	ECA573	54.4683500748754	-177.978408253409	-85.654290017149	209.115412758
108	carmustine	median.norm.EXT	0.383234862526851	FALSE	0.127875793103822	TRUE	0.922340389996013	0.0145010202860972	TRUE	0.572356533391803	0.00181518622574872	FALSE	CSSV	V	ECA554	ECA573	-0.0332357234277406	0.036134742215905	-0.0206220611959975	0.00962298139800806
109	chlorothalonil	mean.TOF	2.87547763377916e-14	FALSE	0.876627428310336	FALSE	2.16493489801906e-14	3.35187433364581e-12	TRUE	0.00108026632573077	5.51594143167744e-05	TRUE	CSSV	V	ECA554	ECA573	11.6588279029059	3.82146213794513	-20.0690859795549	7.77900411885002
110	chlorothalonil	median.TOF	1.08246744900953e-13	FALSE	0.961503855310919	FALSE	1.07580611086178e-13	4.71225836129463e-10	TRUE	0.0620754330794058	0.0171330564272407	TRUE	CSSV	V	ECA554	ECA573	9.65077208034197	2.49518536099597	-16.1260796674073	8.19865869514931
111	chlorothalonil	q75.TOF	2.03170813506404e-14	FALSE	0.753790193249783	TRUE	2.03170813506404e-14	1.41103795314734e-11	TRUE	4.90163465372007e-12	1.02645325572581e-09	TRUE	CSSV	V	ECA554	ECA573	16.0623966967658	-6.13355027291312	-33.8213594941656	20.5622850379886
112	chlorothalonil	mean.EXT	0	FALSE	0.77488612739798	TRUE	0	0.0108437686690244	TRUE	1.70974345792274e-14	1.68753899743024e-14	TRUE	CSSV	V	ECA554	ECA573	32.7088666411023	-34.3845581240611	-63.534373363204	49.4566759916905
113	chlorothalonil	median.EXT	0.452509500218458	FALSE	0.0763621872861776	TRUE	0.780017826573996	0.999506430590465	TRUE	0.521331226213574	0.715929550703992	FALSE	CSSV	V	ECA554	ECA573	-6.08078387977721	0.146893094457552	-4.06800283034521	12.1444803561619
114	chlorothalonil	q75.EXT	2.03170813506404e-14	FALSE	0.731603038488771	FALSE	2.03170813506404e-14	0.145534263860921	TRUE	2.03170813506404e-14	2.03170813506404e-14	TRUE	CSSV	V	ECA554	ECA573	94.838411151736	-81.2901448281206	-114.496340397602	94.657560743328
115	cisplatin	n	0.0438522300665496	FALSE	0.532376426402619	TRUE	0.596754510490652	0.00608340280891762	TRUE	0.940831221754157	0.207745157503249	FALSE	CSSV	V	ECA554	ECA573	9.0344460013941	14.7684885095281	-10.2152483285378	16.4474933643529
116	cisplatin	mean.TOF	0.000883653515668437	TRUE	6.44556630291504e-11	TRUE	0.00258249012650325	0.383477700042389	TRUE	0.104122733504427	4.71303057036909e-06	TRUE	CSSV	V	ECA554	ECA573	5.86336912419048	-0.937880058193349	1.04440041749389	-3.89124752566367
117	cisplatin	median.TOF	0.00366863595431077	TRUE	4.13661094267326e-09	TRUE	0.0079617841165871	0.00942341766474453	TRUE	0.978796954134262	1.09926362457102e-08	TRUE	CSSV	V	ECA554	ECA573	6.04271827639893	-3.94571905062178	1.01538741112457	-5.70054267635482
118	cisplatin	q75.TOF	0.977696600176412	FALSE	5.13888931408246e-12	FALSE	1.11333164909411e-12	1.07358566481253e-12	TRUE	1.07480691013961e-12	0.657149119557201	FALSE	CSSV	V	ECA554	ECA573	6.61288345743242	9.70122564181063	-8.26205058829087	-8.23242518239619
119	cisplatin	q90.TOF	0.00458866495128729	TRUE	0.046569440093818	TRUE	0.903989361023468	0.0184008277528518	TRUE	0.943141050312978	0.138997765119957	TRUE	CSSV	V	ECA554	ECA573	2.38547459968515	-5.60651253122842	4.22462062783669	-5.11842725193893
120	cisplatin	mean.EXT	0.945785856311745	FALSE	0.0175789350752164	FALSE	0.0547224014266061	0.999644594436606	TRUE	0.918018436049144	0.0733036306432401	TRUE	CSSV	V	ECA554	ECA573	9.83288092607258	-2.53016157889373	-2.80400472322861	-2.36233192283338
121	cisplatin	median.EXT	0.970229839857878	FALSE	0.0333994542522398	TRUE	0.0751215577010396	0.0791254290003106	TRUE	0.259683733360408	2.20667125946372e-05	FALSE	CSSV	V	ECA554	ECA573	-8.64556222612664	9.1558464301173	-0.407110542237665	0.701686599447238
122	cisplatin	q75.EXT	1.80829585993969e-06	FALSE	6.02913496905444e-10	FALSE	1.07702735618886e-12	0.00662714923541352	TRUE	0.15830635883379	1.11366471600149e-12	TRUE	CSSV	V	ECA554	ECA573	34.5067961543366	-7.12216479104971	-23.935243861484	5.66271643294001
123	cisplatin	q90.EXT	1.14375175996884e-12	FALSE	0.657324186817545	FALSE	1.11621822895813e-12	0.84176220082764	FALSE	1.13253850742012e-12	1.10944586850792e-12	TRUE	CSSV	V	ECA554	ECA573	56.6756902082222	-54.3534750090241	-45.5144253106273	46.3201486637934
124	cisplatin	norm.n	1.06425979140568e-12	FALSE	1.07058806264604e-12	TRUE	0.982718434564942	3.15159121022646e-09	TRUE	0.0113393702997135	1.07280462069426e-07	FALSE	CSSV	V	ECA554	ECA573	-6.72962806902981	5.51150773578167	-5.78849086777427	10.073868344939
125	paraquat	mean.TOF	0.947854375409533	FALSE	0.0100550501126729	FALSE	0.00107996474341365	7.95704390447183e-05	TRUE	0.00122507530968941	0.947228277009248	FALSE	CSSV	V	ECA554	ECA573	3.09781974802043	5.99138483331069	-4.95804389510668	0.631969246698778
126	paraquat	q10.TOF	3.28601783814442e-05	FALSE	0.182339771824729	FALSE	3.56714657812063e-10	0.212581900276696	TRUE	0.0294575401301096	8.1721143100344e-06	TRUE	CSSV	V	ECA554	ECA573	3.84960285377317	-1.31488722290268	-4.7562411807323	0.650330532693071
127	paraquat	q25.TOF	0.434041720004336	FALSE	0.115837549879608	FALSE	0.865831665203582	0.0724800767796218	TRUE	0.000831817746654639	0.361004834832995	FALSE	CSSV	V	ECA554	ECA573	0.466086386579223	1.70603850034816	-1.5569603637302	-1.01561001525817
128	paraquat	median.TOF	0.0415645839106786	TRUE	0.000616331906089562	TRUE	0.52828965853433	0.000167664013034252	FALSE	4.38359348819972e-10	0.0255013716344737	FALSE	CSSV	V	ECA554	ECA573	1.58246921791337	8.08192346155279	-3.13358575625532	-4.9374791956818
129	paraquat	q75.TOF	0.0298677087475199	FALSE	2.36210773163492e-09	FALSE	4.29656310529936e-14	2.6523228058295e-13	TRUE	7.58710867421186e-06	0.322164256762665	TRUE	CSSV	V	ECA554	ECA573	14.4684416447628	8.67658184836431	-11.2795357759732	-2.2196579187818
130	paraquat	q90.TOF	0.946032284663082	FALSE	0.796910145825114	TRUE	0.43030562525429	0.00640172573982212	TRUE	0.0471525221332083	0.312704046349298	FALSE	CSSV	V	ECA554	ECA573	0.814466608299694	9.13330772248939	-7.36184595390029	4.00449898928672
131	paraquat	mean.EXT	0.788606572946067	FALSE	4.19825979802724e-05	FALSE	2.40592069711276e-07	0.649842285354375	TRUE	0.997538937087265	4.48106389010494e-05	TRUE	CSSV	V	ECA554	ECA573	29.0257584266997	-2.50359820921328	-13.9002949228044	6.42905452406534
132	paraquat	q10.EXT	0.821781618181907	FALSE	0.0125222372916579	FALSE	0.000380188977402995	0.152442070554118	FALSE	0.0200954575039134	1.53728122453956e-08	TRUE	CSSV	V	ECA554	ECA573	7.19011115985979	-5.05289916010732	-2.26832675350162	0.450890922102851
133	paraquat	q25.EXT	0.205344454885476	TRUE	0.00653526802291482	TRUE	0.494232959295181	0.0595210408688089	TRUE	0.96983191226919	0.000777409074778856	TRUE	CSSV	V	ECA554	ECA573	9.73730468784043	-9.03942522976118	3.41297956843384	-5.5372250905913
134	paraquat	median.EXT	0.234166283408807	TRUE	0.0435806671354005	FALSE	3.28330166574631e-05	0.285014849263127	FALSE	0.00201351982463405	4.46923398289556e-09	FALSE	CSSV	V	ECA554	ECA573	-17.0297557365902	9.18891338712292	3.78685738629135	1.75720503797633
135	paraquat	q75.EXT	0.0414664766193515	FALSE	2.07412376163063e-08	FALSE	2.59126053947512e-13	0.38165413636075	FALSE	0.000179193516959497	2.51354492775135e-13	TRUE	CSSV	V	ECA554	ECA573	117.243041489972	-72.7493934392958	-45.4842007914768	34.2745318659991
136	paraquat	q90.EXT	0.694296662331551	FALSE	0.0401160957782895	FALSE	0.000957619649731178	0.95457097022442	TRUE	0.372184672457542	0.000101629475306231	TRUE	CSSV	V	ECA554	ECA573	52.682050440314	-5.58946372755051	-21.5455415527034	48.0516553805559
137	silver	mean.TOF	0.784225321383848	TRUE	0.100924951061643	FALSE	0.50496635054577	2.51514298499345e-07	FALSE	4.19771285673498e-05	9.51253520398154e-11	FALSE	CSSV	V	ECA554	ECA573	-3.4864119286841	9.09283359302394	-1.86752127647061	-1.96611876085721
138	silver	median.TOF	0.0369010718682591	TRUE	9.08061942306304e-08	FALSE	0	0.00345625175890141	FALSE	2.46783061763622e-08	0	FALSE	CSSV	V	ECA554	ECA573	-12.0735984119088	8.25078673356146	2.44384933570905	-0.435909323538912
139	silver	q75.TOF	0.405369259850517	FALSE	0.034982396225069	TRUE	0.641126831186646	0	TRUE	0	0	FALSE	CSSV	V	ECA554	ECA573	-11.4568096132165	19.727504227564	-6.93170069824729	-1.80922071699876
140	silver	q90.TOF	0.00680201837979222	FALSE	0.5288884830617	TRUE	0.19550277004124	1.39469513715795e-09	TRUE	0.0066258252575625	2.17092169346733e-05	FALSE	CSSV	V	ECA554	ECA573	-9.17951590822035	18.2745379403184	-14.0493435676714	2.72802107636518
141	silver	mean.EXT	0.455117320689392	FALSE	0.971956245263068	TRUE	0.713407249746331	4.38657931106645e-05	TRUE	0.0124811804882907	0.00236895014278182	FALSE	CSSV	V	ECA554	ECA573	-2.068498051098	13.3744758029085	-8.59409243747375	2.01827559468526
142	silver	median.EXT	0.000186799379863212	TRUE	3.26405569239796e-14	FALSE	3.26405569239796e-14	6.99440505513849e-14	FALSE	3.26405569239796e-14	3.26405569239796e-14	FALSE	CSSV	V	ECA554	ECA573	-27.5236057755194	24.2873364138749	7.17687117946884	-0.270041623372095
143	silver	q75.EXT	0.556756512120859	TRUE	0.118949317590327	FALSE	0.784485054027712	6.40097752580004e-10	FALSE	1.06020242385263e-06	3.34710037463992e-12	FALSE	CSSV	V	ECA554	ECA573	-17.1091882897051	24.3713384488813	-7.0710510255694	-10.8810507605891
144	silver	q90.EXT	2.2494541086493e-06	FALSE	0.997680655360518	TRUE	2.95136159278453e-06	4.24686977806843e-08	TRUE	0.90431561011435	0.810371665569373	FALSE	CSSV	V	ECA554	ECA573	2.64684308907688	19.056658917581	-51.5857058955178	16.8883179151341
